# Supplementary material
Source: Springer Nature journal article supplement (https://www.springermedizin.de/resource/supplementary/12943_2010_601_MOESM2_ESM.pdf/9555084)

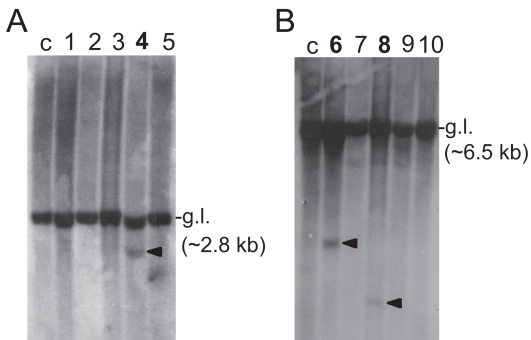

**C**

| Tumor ID | DNA rearrangements in |        |        |        |
|----------|-----------------------|--------|--------|--------|
|          | Ig $\kappa$           | IgH    | TCR-J1 | TCR-J2 |
| 01-367   | +                     | -      | -      | -      |
| 99-34    | -                     | + weak | -      | + weak |
| 01-340   | -                     | +      | -      | -      |
| 99-115   | +                     | -      | -      | -      |
| 01-1064  | -                     | +      | -      | -      |

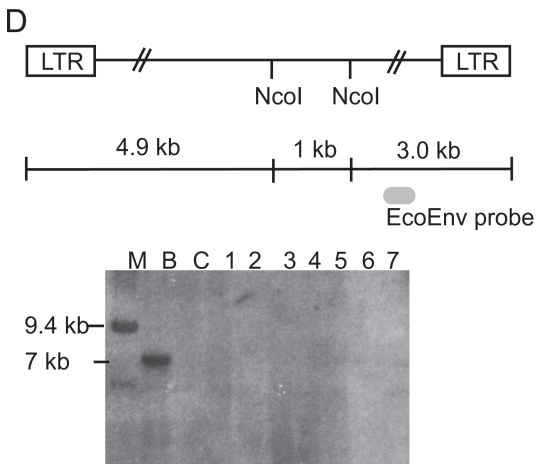

Supplement: MOESM2 [file 9555084]
